# Supplementary material for: Recalcitrant seeds with physiological epicotyl dormancy may limit seedling recruitment of an endangered subtropical oak species
Source: Research Square preprint supplement (doi:10.21203/rs.3.rs-7259877/v1), 2025-09-15
Supplement: Supplementary file 1 [file dccd5ef6bb697e067e84da15.docx]

**Supplementary Figures**

**Fig. S1** Dynamics of average monthly maximum temperature, minimum temperature and precipitation in *Castanopsis kawakamii* Nature Reserve, Sanming City, China, 1952-2019. Data collated from ChinaClim_timeseries (https://doi.org/10.5281/zenodo.4288388).

**Fig. S2** Details of the development of radicle and radicle in *C. kawakamii.* (a-d) Progression of hypocotyl elongation, radicle/root emergence; (e-h) Progression of epicotyl/shoot emergence; (x) and (y) root developed and epicotyl/shoot is still undifferenced.

**Fig. S1** Dynamics of average monthly maximum temperature, minimum temperature and precipitation in *Castanopsis kawakamii* Nature Reserve, Sanming City, China, 1952-2019. Data collated from ChinaClim_timeseries


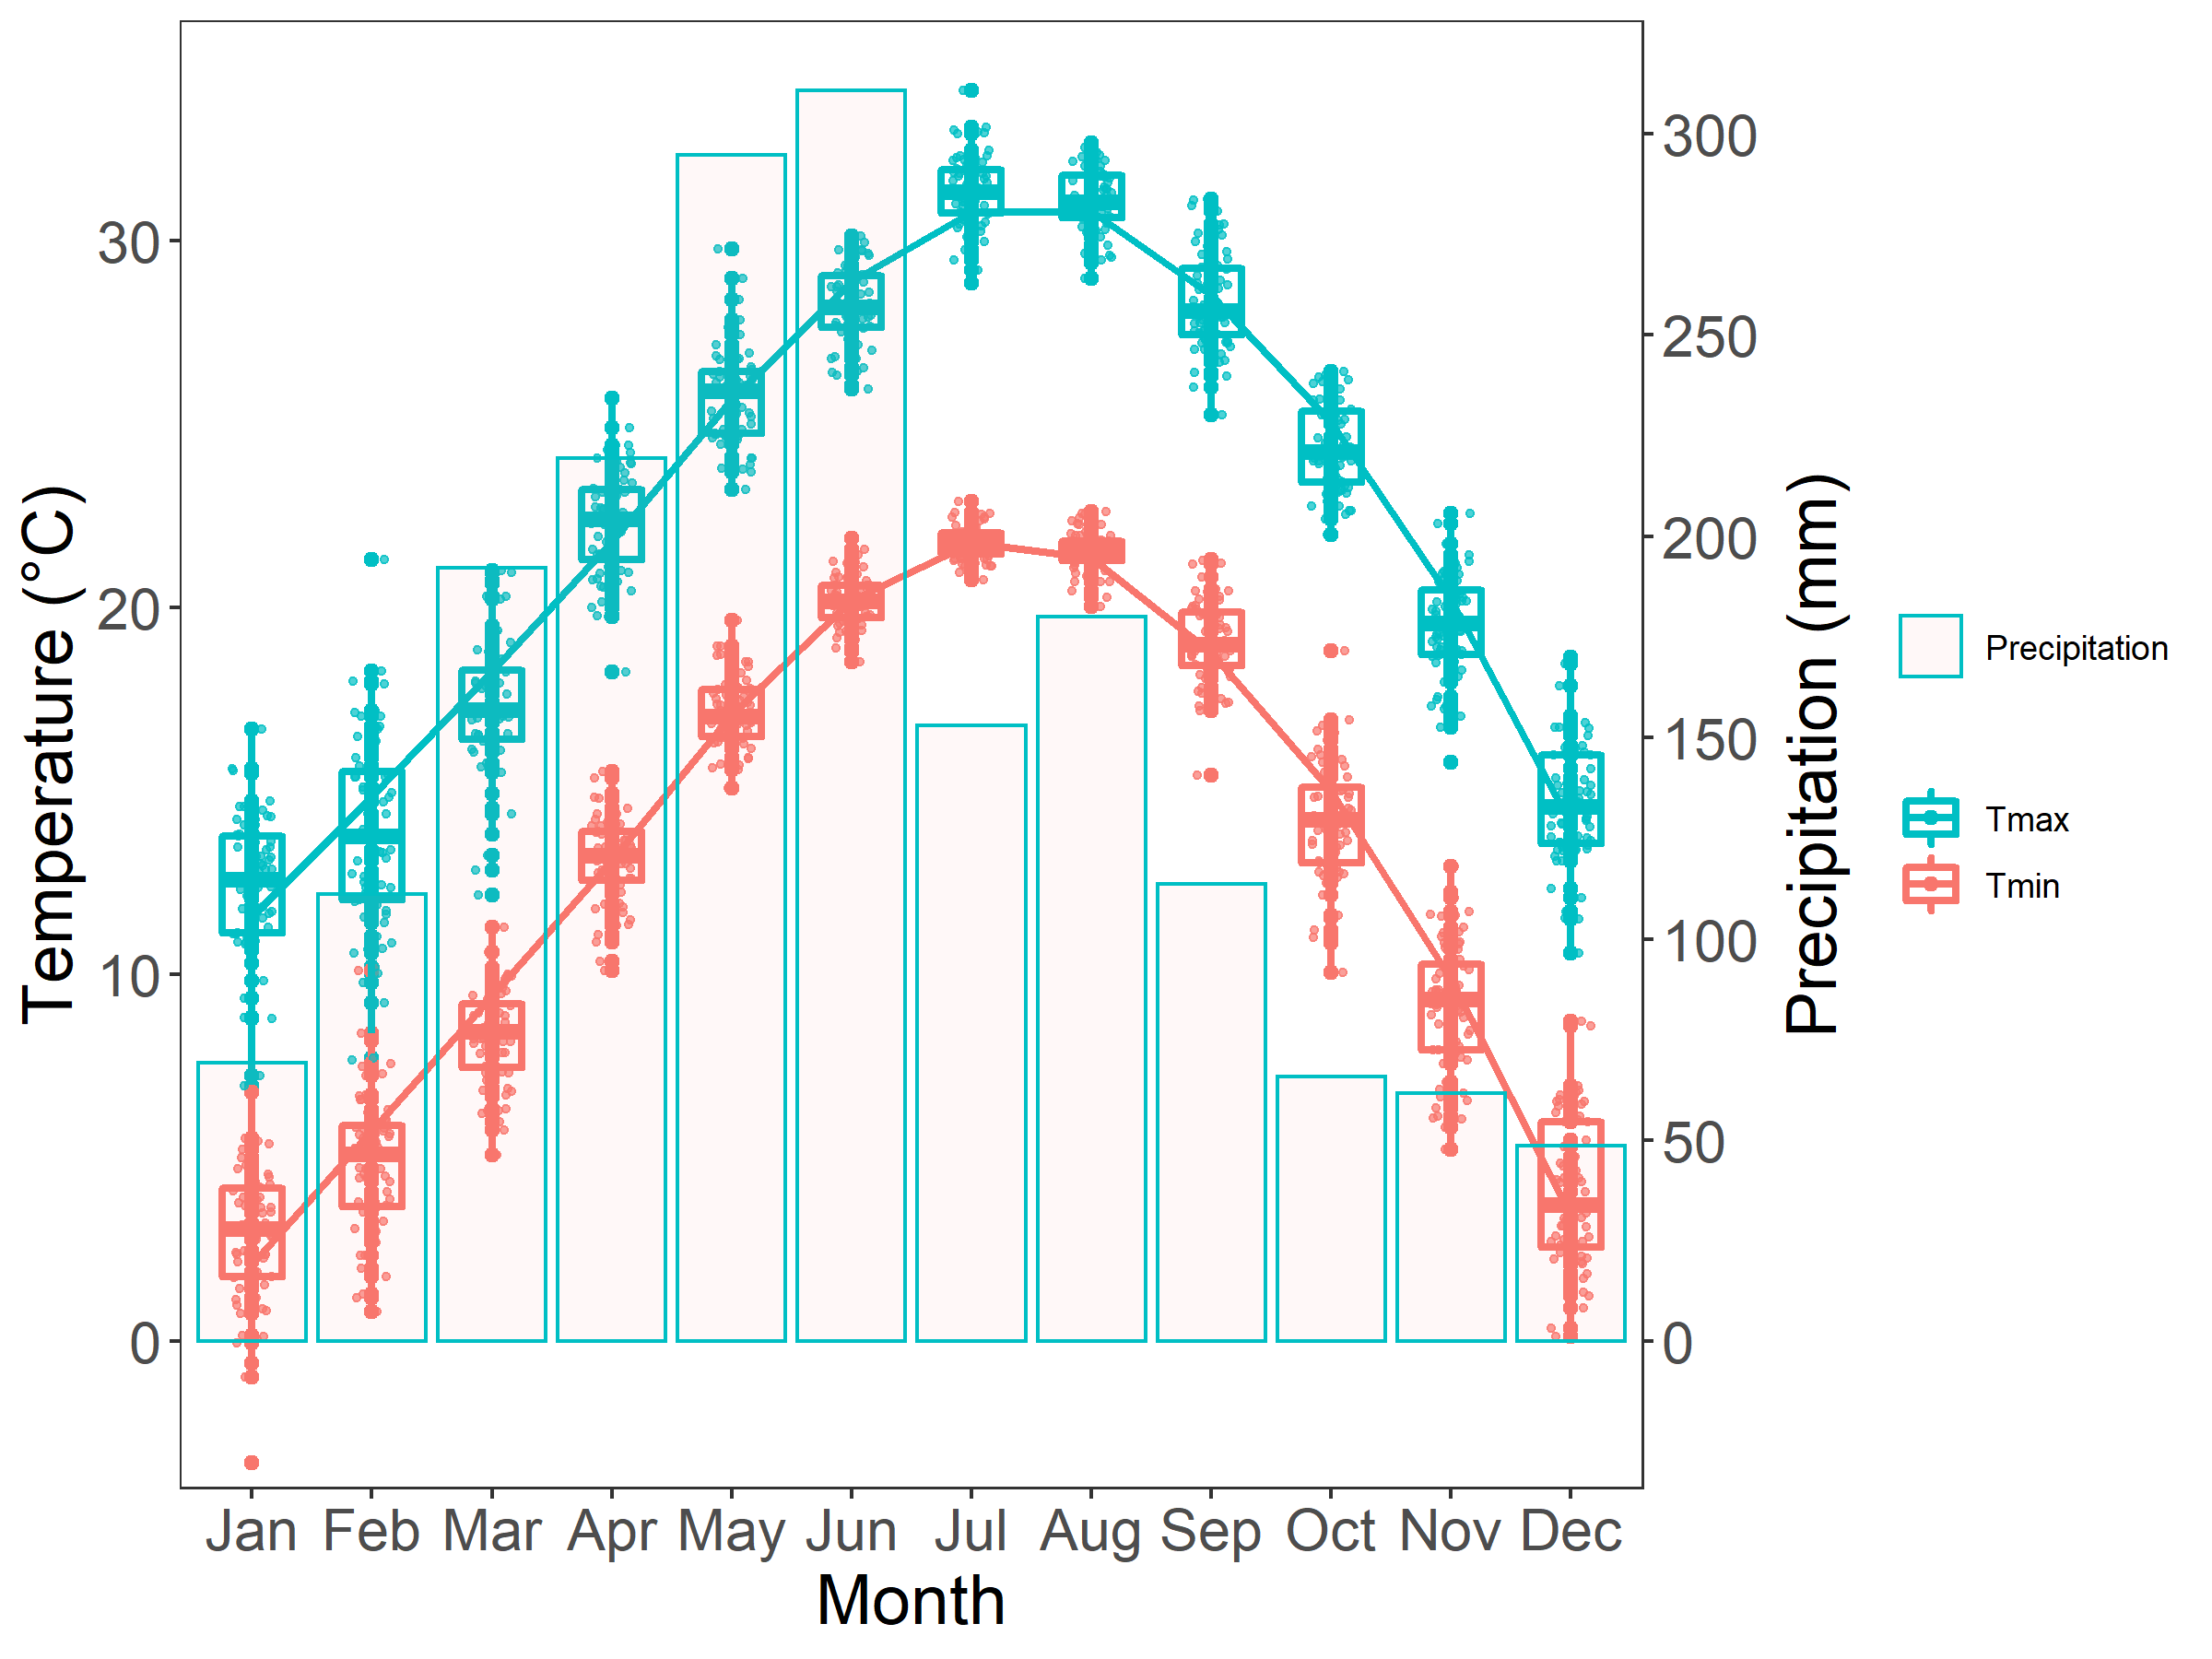


**Fig. S2** Details of the development of radicle and radicle in *C. kawakamii.* (a-d) Progression of hypocotyl elongation, radicle/root emergence; (e-h) Progression of epicotyl/shoot emergence; (x) and (y) root developed and epicotyl/shoot is still undifferenced.

**
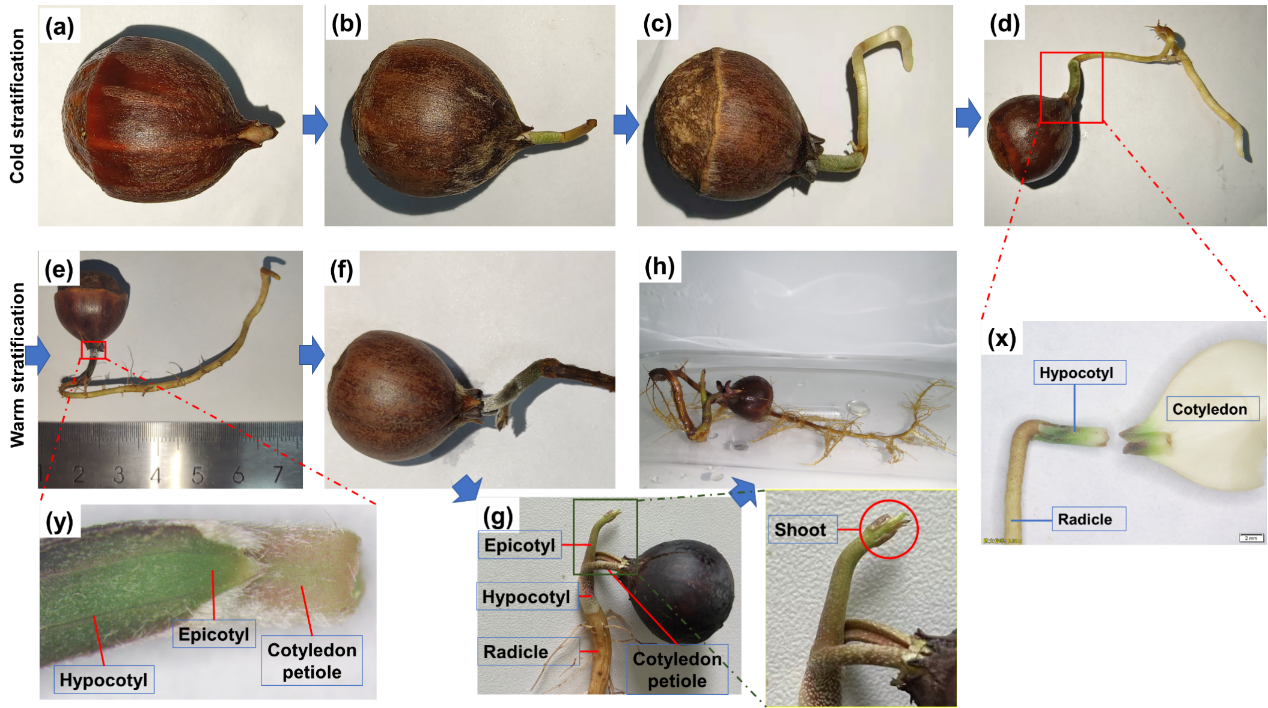
**
